# Supplementary material for: Point-of-Care Portable 3D-Printed Multispectral Sensor for Real-Time Enzyme Activity Monitoring in Healthcare Applications
Source: MDPI journal article supplement (doi:10.3390/bios13010120), 2023-01-10
Supplement: s1 [file s1]

*Supplementary Information*

# **Point-of-Care Portable 3D-Printed Multispectral Sensor for Real-Time Enzyme Activity Monitoring in Healthcare Applications**

**Antony Jesuraj <sup>1</sup> and Umer Hassan <sup>1,2,\*</sup>**

<sup>1</sup> Department of Electrical and Computer Engineering, School of Engineering, Rutgers, The State University of New Jersey, New Brunswick, NJ 08854, USA

<sup>2</sup> Global Health Institute, Rutgers, The State University of New Jersey, New Brunswick, NJ 08901, USA

\* Correspondence: umer.hassan@rutgers.edu; Tel.: +1-(848)-445-2164

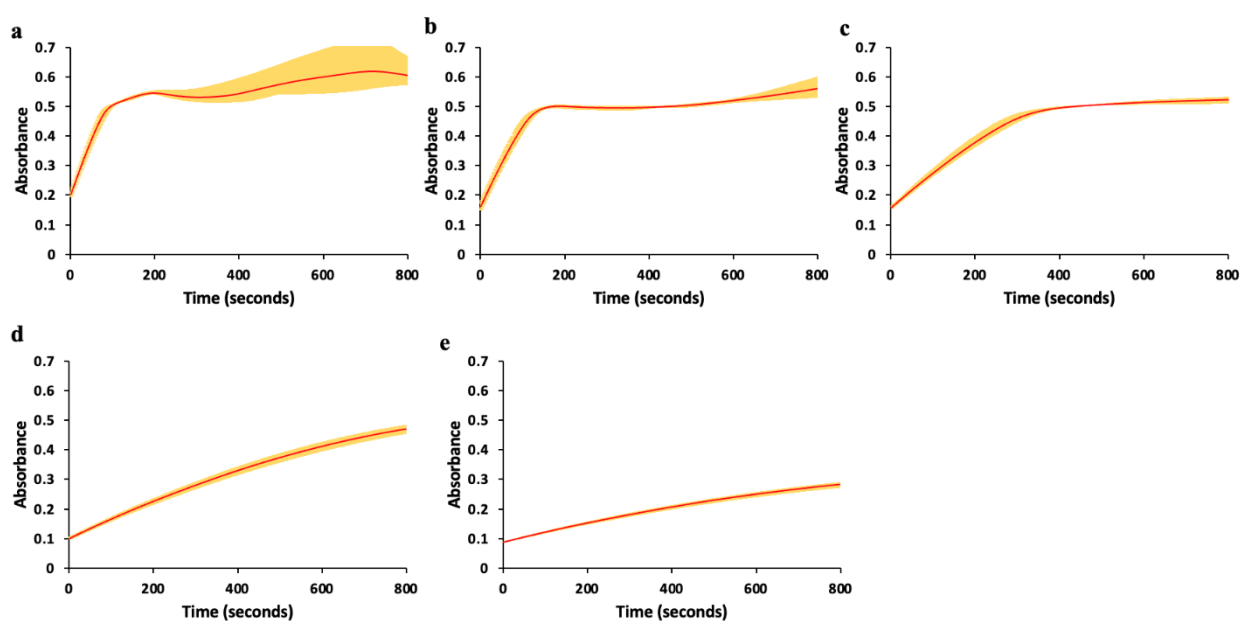

**Figure S1.** Enzyme kinetics monitored using the standard table-top spectrophotometer at a sampling frequency of 1Hz. (a). Rate1 measured over time and the variation in the measured value is indicated as an outline over multiple measurements. (b) Rate2 measured over time and the variation in the measured value is indicated as an outline over multiple measurements. (c) Rate3 measured over time and the variation in the measured value is indicated as an outline over multiple measurements. (d) Rate4 measured over time and the variation in the measured value is indicated as an outline over multiple measurements. (e) Rate5 measured over time and the variation in the measured value is indicated as an outline over multiple measurements.

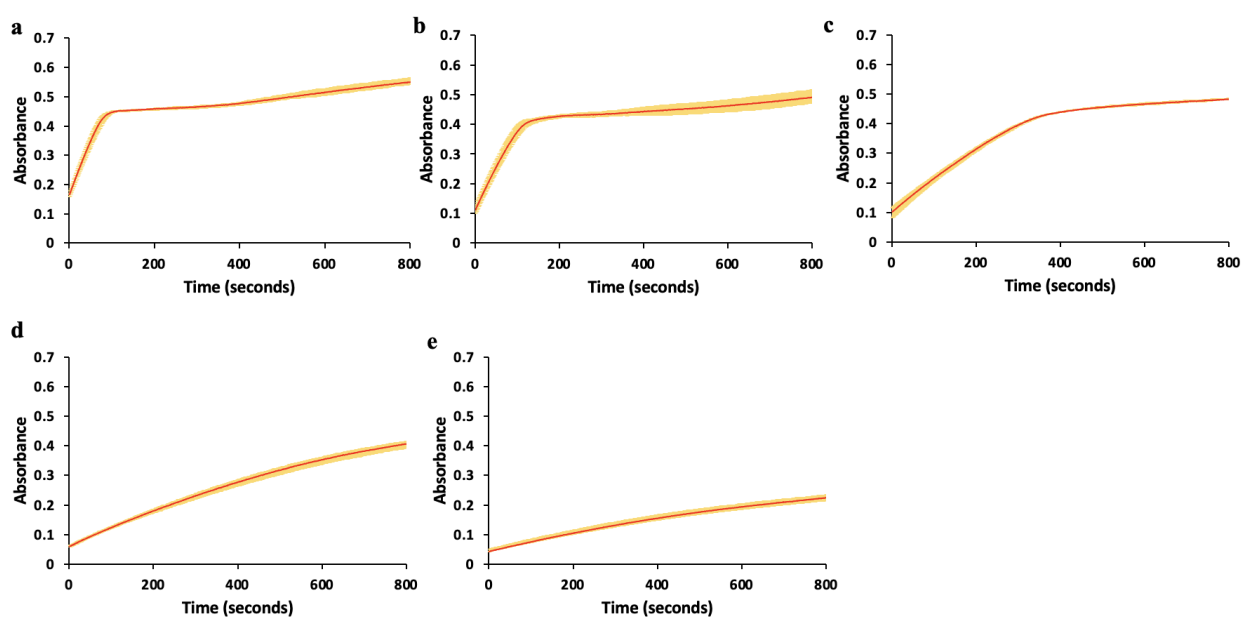

**Figure S2.** Enzyme kinetics monitored using the 3D printed spectrophotometer at a sampling frequency of 1Hz. (a). Rate1 measured over time and the variation in the measured value is indicated as an outline over multiple measurements. (b) Rate2 measured over time and the variation in the measured value is indicated as an outline over multiple measurements. (c) Rate3 measured over time and the variation in the measured value is indicated as an outline over multiple measurements. (d) Rate4 measured over time and the variation in the measured value is indicated as an outline over multiple measurements. (e) Rate5 measured over time and the variation in the measured value is indicated as an outline over multiple measurements.

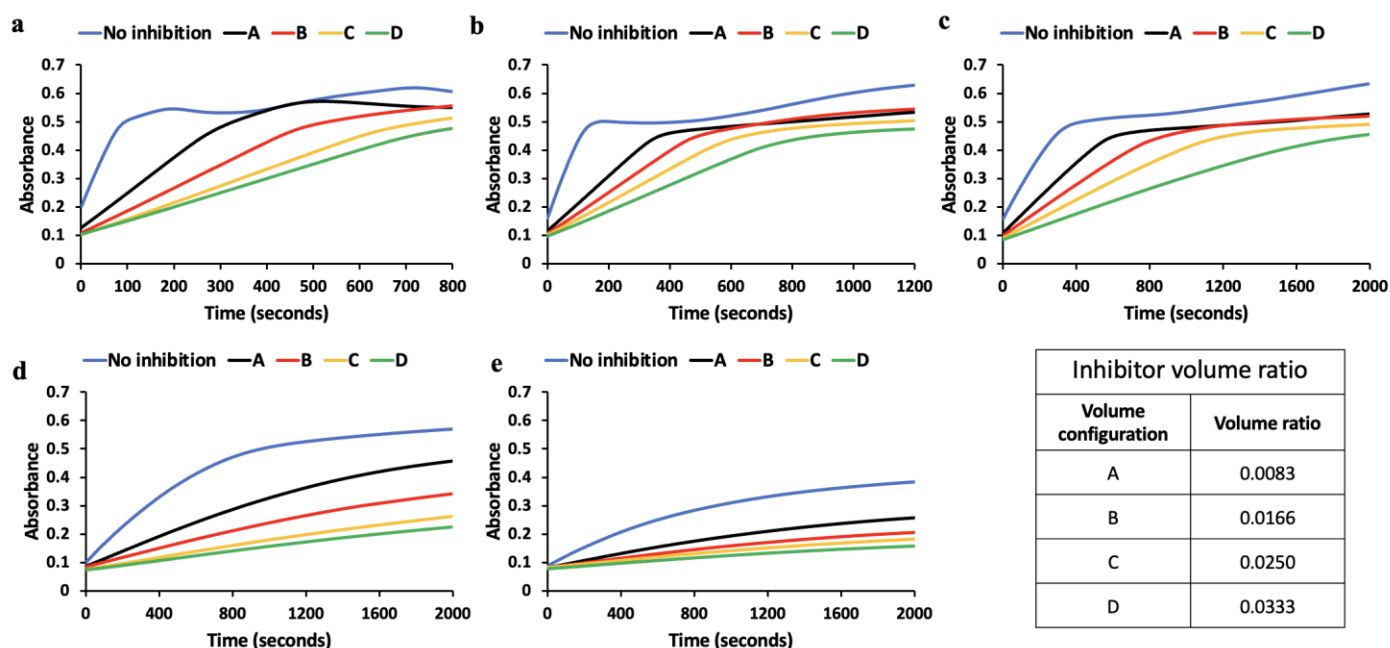

**Figure S3.** The enzyme kinetics measured using the standard table-top spectrophotometer is shown without inhibition and with different degrees of inhibition (controlled by the volume concentration of the inhibitor shown in the inset table). (a) Enzyme kinetics monitored at Rate1 being the fastest rate and at different volume concentration of the inhibitor. (b) Enzyme kinetics monitored at Rate2 without inhibition and at different volume concentration of the inhibitor. (c) Enzyme kinetics monitored at Rate3 without inhibition and at different volume concentration of the inhibitor to inhibit the enzyme activity. (d) Enzyme kinetics monitored at Rate4 without inhibition and at different volume concentration of the inhibitor to inhibit the enzyme activity. (e) Enzyme kinetics monitored at Rate5 being the slowest without inhibition and at different volume concentration of the inhibitor to inhibit the enzyme activity. The table indicates different volume ratios of kojic acid used in the 3mL reaction-mix solution.

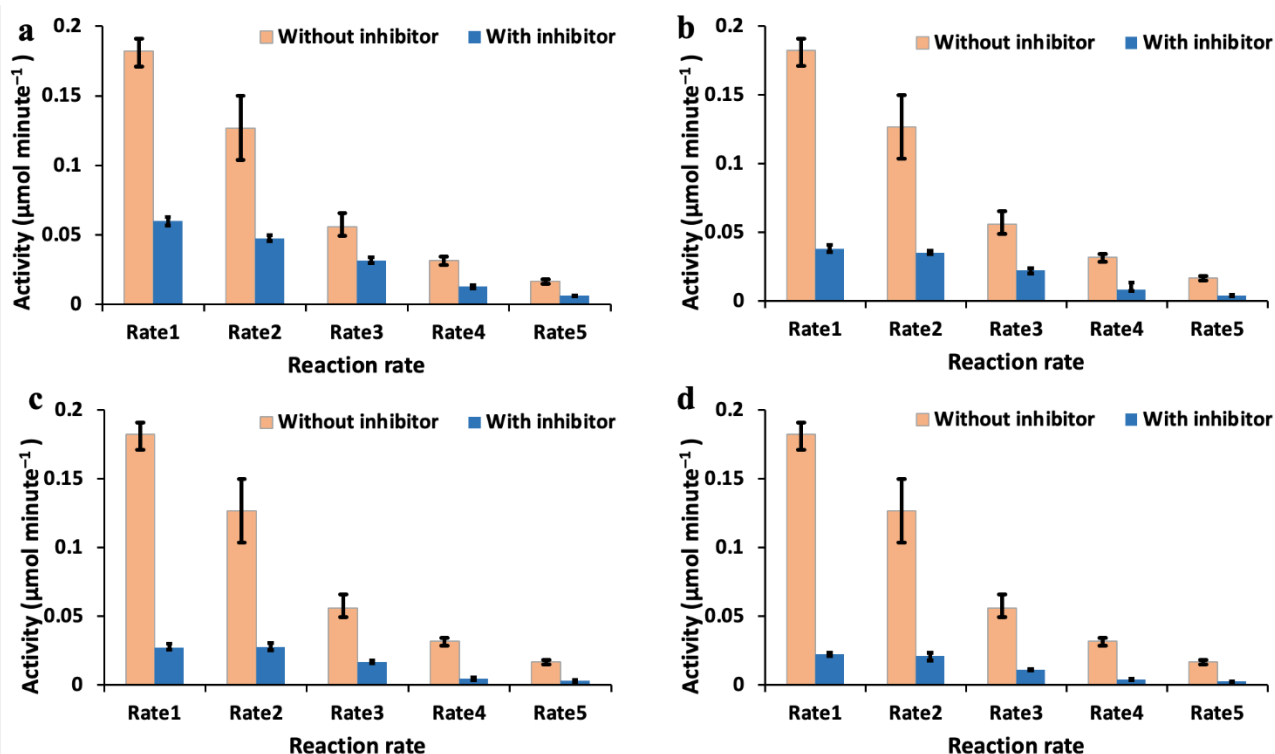

**Figure S4.** The activity calculated from the enzyme kinetics monitored over time by the table-top spectrophotometer is shown here. This activity measured under the influence of different volume concentration of the inhibitor is compared with the activity measured without any inhibitor at different reaction kinetics rate (a) The activity for volume concentration A of the inhibitor is compared with the activity without any inhibition at different kinetics rate including the error bars. (b) The activity for the volume concentration B of the inhibitor used is compared with the activity without any inhibition at different kinetics rate. (c) The activity for the volume concentration C of the inhibitor used is compared with the activity measured without any inhibition at different kinetics rate. (d) The activity for the volume concentration D of the inhibitor used is compared with the activity measured without any inhibition at different kinetics rate.

**Table S1.** This table contains information regarding the different volumes of the reagents and enzymes used in the assay. Further, the enzyme activity measured using the standard table-top spectrophotometer and the 3D printed spectrophotometer at different reaction rates are shown.

| Rate | Volume (mL) |       |            | Activity ( $\mu\text{mol minute}^{-1}$ )<br>Standard table-top spectrophotometer |                    | Activity ( $\mu\text{mol minute}^{-1}$ )<br>3D printed spectrophotometer |                    |
|------|-------------|-------|------------|----------------------------------------------------------------------------------|--------------------|--------------------------------------------------------------------------|--------------------|
|      | PBS         | LDOPA | Tyrosinase | Average                                                                          | Standard Deviation | Average                                                                  | Standard Deviation |
| 1    | 1.940       | 1     | 0.06       | 0.182434                                                                         | 0.01019076         | 0.17739867                                                               | 0.00986176         |
| 2    | 1.960       | 1     | 0.04       | 0.126699                                                                         | 0.01834497         | 0.1205575                                                                | 0.02488914         |
| 3    | 1.980       | 1     | 0.02       | 0.055776                                                                         | 0.00512842         | 0.053369                                                                 | 0.00469721         |
| 4    | 1.990       | 1     | 0.01       | 0.031659                                                                         | 0.00186201         | 0.030212                                                                 | 0.002719438        |
| 5    | 1.995       | 1     | 0.005      | 0.016498                                                                         | 0.00121969         | 0.01577                                                                  | 0.00125465         |

**Table S2.** The data for calculating the activity for reaction rates with and without inhibitor during multiple trials of the experiment is presented here for Rate1.

| 3D printed spectrophotometer         |               |                             |                             |                             |                              |
|--------------------------------------|---------------|-----------------------------|-----------------------------|-----------------------------|------------------------------|
|                                      | No Inhibition | 25 $\mu\text{L}$ kojic acid | 50 $\mu\text{L}$ kojic acid | 75 $\mu\text{L}$ kojic acid | 100 $\mu\text{L}$ kojic acid |
| Trial 1 (0 - 60)                     | 0.2232        | 0.0702                      | 0.0473                      | 0.0323                      | 0.0281                       |
| Trial 1 (0 - 120)                    | 0.0595        | 0.0707                      | 0.0475                      | 0.0319                      | 0.0272                       |
| Trial 1 (0 - 180)                    | 0.0031        | 0.0735                      | 0.0478                      | 0.0321                      | 0.029                        |
| Trial 2 (0 - 60)                     | 0.2176        | 0.2137                      | 0.0439                      | 0.0328                      | 0.0257                       |
| Trial 2 (0 - 120)                    | 0.0645        | 0.0723                      | 0.0465                      | 0.0325                      | 0.0238                       |
| Trial 2 (0 - 180)                    | 0.0031        | 0.0047                      | 0.0458                      | 0.0343                      | 0.0274                       |
| Trial 3 (0 - 60)                     | 0.2004        | 0.0717                      | 0.0437                      | 0.0337                      | 0.0256                       |
| Trial 3 (0 - 120)                    | 0.0929        | 0.0716                      | 0.0476                      | 0.0306                      | 0.028                        |
| Trial 3 (0 - 180)                    | 0.0078        | 0.0723                      | 0.0476                      | 0.0337                      | 0.0283                       |
| Averaged                             | 0.21373333    | 0.11853333                  | 0.04496667                  | 0.03293333                  | 0.02646667                   |
| <b>Final Activity</b>                | 0.17739867    | 0.09838267                  | 0.03732233                  | 0.02733467                  | 0.02196733                   |
| Standard table-top spectrophotometer |               |                             |                             |                             |                              |
|                                      | No Inhibition | 25 $\mu\text{L}$ kojic acid | 50 $\mu\text{L}$ kojic acid | 75 $\mu\text{L}$ kojic acid | 100 $\mu\text{L}$ kojic acid |
| Trial 1 (0 - 60)                     | 0.2303        | 0.0714                      | 0.0489                      | 0.0311                      | 0.0281                       |
| Trial 1 (0 - 120)                    | 0.0768        | 0.0737                      | 0.0495                      | 0.0319                      | 0.0299                       |
| Trial 1 (0 - 180)                    | 0.0242        | 0.0747                      | 0.0496                      | 0.0327                      | 0.0303                       |
| Trial 2 (0 - 60)                     | 0.2228        | 0.0693                      | 0.043                       | 0.0328                      | 0.0254                       |
| Trial 2 (0 - 120)                    | 0.0903        | 0.0724                      | 0.0454                      | 0.0353                      | 0.0269                       |
| Trial 2 (0 - 180)                    | 0.0253        | 0.074                       | 0.047                       | 0.0359                      | 0.0277                       |
| Trial 3 (0 - 60)                     | 0.2063        | 0.0756                      | 0.0447                      | 0.0337                      | 0.0276                       |
| Trial 3 (0 - 120)                    | 0.1185        | 0.0775                      | 0.0477                      | 0.0343                      | 0.029                        |
| Trial 3 (0 - 180)                    | 0.0288        | 0.077                       | 0.0477                      | 0.035                       | 0.0298                       |
| Averaged                             | 0.2198        | 0.0721                      | 0.04553333                  | 0.03253333                  | 0.02703333                   |
| <b>Final Activity</b>                | 0.182434      | 0.059843                    | 0.03779267                  | 0.02700267                  | 0.02243767                   |

**Table S3.** The data for calculating the activity for reaction rates with and without inhibitor during multiple trials of the experiment is presented here for Rate2.

| <b>3D printed spectrophotometer</b>         |               |                 |                 |                 |                  |
|---------------------------------------------|---------------|-----------------|-----------------|-----------------|------------------|
|                                             | No Inhibition | 25µL kojic acid | 50µL kojic acid | 75µL kojic acid | 100µL kojic acid |
| Trial 1 (0 - 60)                            | 0.1683        | 0.0586          | 0.0413          | 0.0304          | 0.0253           |
| Trial 1 (0 - 120)                           | 0.1219        | 0.056           | 0.0417          | 0.0299          | 0.0248           |
| Trial 1 (0 - 180)                           | 0.0277        | 0.0586          | 0.0435          | 0.0313          | 0.027            |
| Trial 2 (0 - 60)                            | 0.1673        | 0.052           | 0.041           | 0.0324          | 0.0264           |
| Trial 2 (0 - 120)                           | 0.1246        | 0.0508          | 0.0401          | 0.0343          | 0.026            |
| Trial 2 (0 - 180)                           | 0.0257        | 0.0529          | 0.0418          | 0.0357          | 0.0277           |
| Trial 3 (0 - 60)                            | 0.1801        | 0.0575          | 0.04            | 0.0324          | 0.0214           |
| Trial 3 (0 - 120)                           | 0.1093        | 0.0569          | 0.0418          | 0.0301          | 0.0218           |
| Trial 3 (0 - 180)                           | 0.0087        | 0.0587          | 0.0418          | 0.0331          | 0.0223           |
| Averaged                                    | 0.14525       | 0.05577778      | 0.04144444      | 0.03217778      | 0.02474444       |
| <b>Final Activity</b>                       | 0.1205575     | 0.04629556      | 0.03439889      | 0.02670756      | 0.02053789       |
| <b>Standard table-top spectrophotometer</b> |               |                 |                 |                 |                  |
|                                             | No Inhibition | 25µL kojic acid | 50µL kojic acid | 75µL kojic acid | 100µL kojic acid |
| Trial 1 (0 - 60)                            | 0.1696        | 0.0594          | 0.0425          | 0.0306          | 0.0253           |
| Trial 1 (0 - 120)                           | 0.1397        | 0.0598          | 0.0426          | 0.0323          | 0.0273           |
| Trial 1 (0 - 180)                           | 0.0363        | 0.0601          | 0.0437          | 0.0335          | 0.0277           |
| Trial 2 (0 - 60)                            | 0.1649        | 0.0524          | 0.0415          | 0.0324          | 0.0264           |
| Trial 2 (0 - 120)                           | 0.1359        | 0.0539          | 0.0438          | 0.0365          | 0.0282           |
| Trial 2 (0 - 180)                           | 0.04          | 0.0548          | 0.045           | 0.0375          | 0.0291           |
| Trial 3 (0 - 60)                            | 0.1808        | 0.0583          | 0.0411          | 0.0324          | 0.0215           |
| Trial 3 (0 - 120)                           | 0.125         | 0.0596          | 0.0436          | 0.0336          | 0.0234           |
| Trial 3 (0 - 180)                           | 0.0253        | 0.0601          | 0.0436          | 0.0344          | 0.0243           |
| Averaged                                    | 0.15265       | 0.0576          | 0.0429          | 0.0337          | 0.0259           |
| <b>Final Activity</b>                       | 0.1266995     | 0.047808        | 0.035607        | 0.027971        | 0.021497         |

**Table S4.** The data for calculating the activity for reaction rates with and without inhibitor during multiple trials of the experiment is presented here for Rate3.

| <b>3D printed spectrophotometer</b>         |               |                 |                 |                 |                  |
|---------------------------------------------|---------------|-----------------|-----------------|-----------------|------------------|
|                                             | No Inhibition | 25µL kojic acid | 50µL kojic acid | 75µL kojic acid | 100µL kojic acid |
| Trial 1 (0 - 60)                            | 0.0748        | 0.0368          | 0.028           | 0.0206          | 0.0134           |
| Trial 1 (0 - 120)                           | 0.0697        | 0.0367          | 0.0273          | 0.0204          | 0.0126           |
| Trial 1 (0 - 180)                           | 0.0602        | 0.037           | 0.027           | 0.0214          | 0.0143           |
| Trial 2 (0 - 60)                            | 0.0674        | 0.04            | 0.0226          | 0.0187          | 0.0124           |
| Trial 2 (0 - 120)                           | 0.0625        | 0.0382          | 0.0245          | 0.0182          | 0.0121           |
| Trial 2 (0 - 180)                           | 0.0598        | 0.0395          | 0.0252          | 0.021           | 0.0125           |
| Trial 3 (0 - 60)                            | 0.0646        | 0.0372          | 0.0272          | 0.02            | 0.013            |
| Trial 3 (0 - 120)                           | 0.0632        | 0.035           | 0.028           | 0.0183          | 0.0134           |
| Trial 3 (0 - 180)                           | 0.0562        | 0.0373          | 0.028           | 0.0205          | 0.0132           |
| Averaged                                    | 0.0643        | 0.0375          | 0.0264          | 0.0199          | 0.013            |
| <b>Final Activity</b>                       | 0.053369      | 0.031125        | 0.021912        | 0.016517        | 0.01079          |
| <b>Standard table-top spectrophotometer</b> |               |                 |                 |                 |                  |
|                                             | No Inhibition | 25µL kojic acid | 50µL kojic acid | 75µL kojic acid | 100µL kojic acid |
| Trial 1 (0 - 60)                            | 0.079         | 0.0371          | 0.0281          | 0.0204          | 0.0134           |
| Trial 1 (0 - 120)                           | 0.0736        | 0.0375          | 0.0285          | 0.0209          | 0.0139           |
| Trial 1 (0 - 180)                           | 0.067         | 0.0373          | 0.0284          | 0.0214          | 0.0139           |
| Trial 2 (0 - 60)                            | 0.0693        | 0.0408          | 0.0243          | 0.0187          | 0.0128           |
| Trial 2 (0 - 120)                           | 0.0662        | 0.0401          | 0.0247          | 0.0192          | 0.0128           |
| Trial 2 (0 - 180)                           | 0.0615        | 0.0396          | 0.0251          | 0.0197          | 0.013            |
| Trial 3 (0 - 60)                            | 0.066         | 0.0375          | 0.0279          | 0.02            | 0.0134           |
| Trial 3 (0 - 120)                           | 0.0627        | 0.0371          | 0.028           | 0.0199          | 0.0138           |
| Trial 3 (0 - 180)                           | 0.0591        | 0.0366          | 0.028           | 0.0199          | 0.014            |
| Averaged                                    | 0.0672        | 0.0382          | 0.027           | 0.02            | 0.0134           |
| <b>Final Activity</b>                       | 0.055776      | 0.031706        | 0.02241         | 0.0166          | 0.011122         |



**Table S5.** The data for calculating the activity for reaction rates with and without inhibitor during multiple trials of the experiment is presented here for Rate4.

| <b>3D printed spectrophotometer</b>         |               |                 |                 |                 |                  |
|---------------------------------------------|---------------|-----------------|-----------------|-----------------|------------------|
|                                             | No Inhibition | 25µL kojic acid | 50µL kojic acid | 75µL kojic acid | 100µL kojic acid |
| Trial 1 (0 - 60)                            | 0.0381        | 0.0162          | 0.0086          | 0.0054          | 0.0048           |
| Trial 1 (0 - 120)                           | 0.0336        | 0.0162          | 0.0081          | 0.0043          | 0.0042           |
| Trial 1 (0 - 180)                           | 0.0308        | 0.0155          | 0.0096          | 0.0056          | 0.0037           |
| Trial 2 (0 - 60)                            | 0.0403        | 0.0131          | 0.0099          | 0.0043          | 0.0036           |
| Trial 2 (0 - 120)                           | 0.0376        | 0.0154          | 0.0069          | 0.0062          | 0.0048           |
| Trial 2 (0 - 180)                           | 0.0346        | 0.014           | 0.0097          | 0.0056          | 0.0037           |
| Trial 3 (0 - 60)                            | 0.0405        | 0.0144          | 0.0073          | 0.0049          | 0.0042           |
| Trial 3 (0 - 120)                           | 0.0379        | 0.0156          | 0.0081          | 0.0062          | 0.0048           |
| Trial 3 (0 - 180)                           | 0.0342        | 0.0148          | 0.0069          | 0.0056          | 0.0037           |
| Averaged                                    | 0.0364        | 0.015           | 0.0084          | 0.0053          | 0.0042           |
| <b>Final Activity</b>                       | 0.030212      | 0.01245         | 0.006972        | 0.004399        | 0.003486         |
|                                             |               |                 |                 |                 |                  |
| <b>Standard table-top spectrophotometer</b> |               |                 |                 |                 |                  |
|                                             | No Inhibition | 25µL kojic acid | 50µL kojic acid | 75µL kojic acid | 100µL kojic acid |
| Trial 1 (0 - 60)                            | 0.0385        | 0.0166          | 0.0089          | 0.0053          | 0.0048           |
| Trial 1 (0 - 120)                           | 0.0364        | 0.0166          | 0.0096          | 0.0054          | 0.0044           |
| Trial 1 (0 - 180)                           | 0.0342        | 0.0164          | 0.01            | 0.0058          | 0.0048           |
| Trial 2 (0 - 60)                            | 0.0407        | 0.0145          | 0.0087          | 0.0043          | 0.004            |
| Trial 2 (0 - 120)                           | 0.0385        | 0.0151          | 0.0095          | 0.006           | 0.0048           |
| Trial 2 (0 - 180)                           | 0.0366        | 0.0153          | 0.0098          | 0.0062          | 0.0051           |
| Trial 3 (0 - 60)                            | 0.0413        | 0.0153          | 0.016           | 0.0049          | 0.0044           |
| Trial 3 (0 - 120)                           | 0.0396        | 0.0162          | 0.0099          | 0.0065          | 0.0047           |
| Trial 3 (0 - 180)                           | 0.0375        | 0.0165          | 0.0099          | 0.0066          | 0.0051           |
| Averaged                                    | 0.0381        | 0.0158          | 0.0103          | 0.0057          | 0.0047           |
| <b>Final Activity</b>                       | 0.031659      | 0.0126874       | 0.0082709       | 0.0045771       | 0.0037741        |

**Table S6.** The data for calculating the activity for reaction rates with and without inhibitor during multiple trials of the experiment is presented here for Rate5.

| <b>3D printed spectrophotometer</b>         |               |                 |                 |                 |                  |
|---------------------------------------------|---------------|-----------------|-----------------|-----------------|------------------|
|                                             | No Inhibition | 25µL kojic acid | 50µL kojic acid | 75µL kojic acid | 100µL kojic acid |
| Trial 1 (0 - 60)                            | 0.0208        | 0.0077          | 0.0041          | 0.0024          | 0.0023           |
| Trial 1 (0 - 120)                           | 0.0208        | 0.0073          | 0.0053          | 0.0031          | 0.0029           |
| Trial 1 (0 - 180)                           | 0.0179        | 0.0074          | 0.0042          | 0.0037          | 0.0024           |
| Trial 2 (0 - 60)                            | 0.0183        | 0.0078          | 0.0059          | 0.0042          | 0.0017           |
| Trial 2 (0 - 120)                           | 0.0185        | 0.0067          | 0.0042          | 0.003           | 0.0023           |
| Trial 2 (0 - 180)                           | 0.0166        | 0.0062          | 0.0042          | 0.0031          | 0.0023           |
| Trial 3 (0 - 60)                            | 0.0208        | 0.0066          | 0.0053          | 0.0041          | 0.0012           |
| Trial 3 (0 - 120)                           | 0.0192        | 0.0067          | 0.0041          | 0.003           | 0.0041           |
| Trial 3 (0 - 180)                           | 0.0181        | 0.0074          | 0.0036          | 0.003           | 0.0012           |
| Averaged                                    | 0.019         | 0.0071          | 0.0045          | 0.0033          | 0.0023           |
| <b>Final Activity</b>                       | 0.01577       | 0.00589         | 0.003735        | 0.002739        | 0.001909         |
| <b>Standard table-top spectrophotometer</b> |               |                 |                 |                 |                  |
|                                             | No Inhibition | 25µL kojic acid | 50µL kojic acid | 75µL kojic acid | 100µL kojic acid |
| Trial 1 (0 - 60)                            | 0.0219        | 0.0075          | 0.0045          | 0.0032          | 0.0023           |
| Trial 1 (0 - 120)                           | 0.0194        | 0.0073          | 0.0049          | 0.0042          | 0.0028           |
| Trial 1 (0 - 180)                           | 0.021         | 0.0071          | 0.0041          | 0.0041          | 0.0027           |
| Trial 2 (0 - 60)                            | 0.0219        | 0.0078          | 0.0047          | 0.0036          | 0.0031           |
| Trial 2 (0 - 120)                           | 0.0189        | 0.0075          | 0.0052          | 0.0036          | 0.003            |
| Trial 2 (0 - 180)                           | 0.0201        | 0.0076          | 0.0047          | 0.0034          | 0.0029           |
| Trial 3 (0 - 60)                            | 0.0192        | 0.0077          | 0.0049          | 0.0037          | 0.003            |
| Trial 3 (0 - 120)                           | 0.0176        | 0.0074          | 0.0053          | 0.0036          | 0.0029           |
| Trial 3 (0 - 180)                           | 0.0189        | 0.0075          | 0.0045          | 0.0036          | 0.0029           |
| Averaged                                    | 0.0197        | 0.0075          | 0.0048          | 0.0037          | 0.0028           |
| <b>Final Activity</b>                       | 0.016498      | 0.00623         | 0.003984        | 0.003071        | 0.002324         |
